# Supplementary material for: Effects of Phosphate Shortage on Root Growth and Hormone Content of Barley Depend on Capacity of the Roots to Accumulate ABA
Source: MDPI journal article supplement (doi:10.3390/plants9121722), 2020-12-07
Supplement: s1 [file s1]

**Table S1.** Analysis of variance of shoot and root mass, root/shoot fresh mass ratio of WT and Az34 genotypes grown for 4 day on nutrient solutions with or without phosphate (P level). P values are presented for effects of genotype, P level and their interaction.

| Effect or Interaction | Shoot Mass | Root Mass | Root/Shoot Ratio |
|-----------------------|------------|-----------|------------------|
| Genotype              | 0.011      | <0.001    | 0.014            |
| P level               | <0.001     | 0.10      | 0.011            |
| Genotype x P level    | 0.70       | <0.001    | 0.023            |

**Table S2.** Analysis of variance total primary root length, lateral root number and lateral root density of WT and Az34 genotypes grown for 4 day on nutrient solutions with or without phosphate (P level). P values are presented for effects of genotype, P level and their interaction.

| Effect or Interaction | Length of Primary Roots | Lateral Root Number | Lateral Root Density |
|-----------------------|-------------------------|---------------------|----------------------|
| Genotype              | 0.004                   | 0.73                | 0.003                |
| P level               | 0.49                    | 0.068               | 0.31                 |
| Genotype x P level    | 0.026                   | 0.003               | 0.72                 |

**Table S3.** Analysis of variance of ABA concentrations of WT and Az34 genotypes grown for 1 day on nutrient solutions with or without phosphate (P level). P values are presented for effects of genotype, P level and their interaction.

| Effect or Interaction | Bulk Shoot | Bulk Root | Root Tips |
|-----------------------|------------|-----------|-----------|
| Genotype              | 0.15       | <0.001    | <0.001    |
| P level               | 0.76       | 0.49      | 0.43      |
| Genotype x P level    | 0.62       | 0.05      | <0.001    |

**Table S4.** Analysis of variance of IAA concentrations of WT and Az34 genotypes grown for 1 day on nutrient solutions with or without phosphate (P level). P values are presented for effects of genotype, P level and their interaction.

| Effect or Interaction | Bulk Shoot | Bulk Root | Root Tips |
|-----------------------|------------|-----------|-----------|
| Genotype              | 0.56       | 0.44      | 0.08      |
| P level               | 0.048      | <0.001    | 0.75      |
| Genotype x P level    | 0.31       | 0.002     | 0.001     |

**Table S5.** Analysis of variance of total concentrations of zeatin derivatives (free zeatin+ zeatin riboside+zeatin nucleotide) of WT and Az34 genotypes grown for 1 day on nutrient solutions with or without phosphate (P level). P values are presented for effects of genotype, P level and their interaction.

| Effect or Interaction | Bulk Shoot | Bulk Root | Root Tips |
|-----------------------|------------|-----------|-----------|
| Genotype              | 0.54       | 0.14      | 0.046     |
| P level               | 0.087      | 0.50      | <0.001    |
| Genotype x P level    | 0.019      | 0.35      | 0.015     |

**Table S6.** Analysis of variance of cytokinin oxidase activity and *HvIPT1* transcript abundance in the root tips of Steptoe and Az34 (genotypes) grown for 1 day on the nutrient solutions with or without phosphate (P level). P values are presented for effects of genotype, P level and their interaction.

| Effect or Interaction | Cytokinin Oxidase Activity | <i>HvIPT1</i> Transcript Abundance |
|-----------------------|----------------------------|------------------------------------|
| Genotype              | 0.07                       | <0.001                             |
| P level               | 0.003                      | 0.007                              |
| Genotype x P level    | 0.41                       | 0.036                              |
